1 **Microbial cysteine degradation is a source of hydrogen**  
2 **sulfide in oxic freshwater lakes**

3

4 Patricia Q. Tran<sup>1,2\*</sup>, Samantha C. Bachand<sup>1\*</sup>, Jacob C. Hotvedt<sup>1\*</sup>, Kristopher Kieft<sup>1,3</sup>, Elizabeth  
5 A. McDaniel<sup>1,3</sup>, Katherine D. McMahon<sup>1,4</sup>, Karthik Anantharaman<sup>1+</sup>

6

7 1. Department of Bacteriology, University of Wisconsin-Madison, WI, USA

8 2. Department of Integrative Biology, University of Wisconsin-Madison, WI, USA

9 3. Microbiology Doctoral Training Program, University of Wisconsin-Madison, WI, USA

10 4. Department of Civil and Environmental Engineering, University of Wisconsin-Madison,  
11 WI, USA

12

13

14 \* Patricia Q. Tran, Samantha C. Bachand and Jacob C. Hotvedt are co-first authors.

15

16 + Corresponding author: Karthik Anantharaman ([karthik@bact.wisc.edu](mailto:karthik@bact.wisc.edu))

17

18

19

20

21

22 ***Word count: 3415 words without methods***

## 23 **Abstract**

24 The sulfur-containing amino acid cysteine is abundant in the environment including in  
25 freshwater lakes. Biological degradation of cysteine can result in hydrogen sulfide (H<sub>2</sub>S), a toxic  
26 and ecologically relevant compound that is a central player in biogeochemical cycling in aquatic  
27 environments, including freshwater lakes. Here, we investigated the ecological significance of  
28 cysteine in oxic freshwater lake environments, using model systems of isolated cultures,  
29 controlled growth experiments, and multi-omics. We screened bacterial isolates enriched from  
30 natural lake water for their ability to produce H<sub>2</sub>S when provided cysteine. In total, we identified  
31 29 isolates that produced H<sub>2</sub>S and belonged to the phylum proteobacteria Bacteroidetes,  
32 Proteobacteria and Actinobacteria. To understand the genomic and genetic basis for cysteine  
33 degradation and H<sub>2</sub>S production, we further characterized 3 freshwater isolates using whole-  
34 genome sequencing, and quantitatively tracked cysteine and H<sub>2</sub>S levels over their growth ranges:  
35 *Stenotrophomonas maltophilia*, *Stenotrophomonas bentonitica* (Gammaproteobacteria) and  
36 *Chryseobacterium piscium* (Bacteroidetes). We observed a decrease in cysteine and increase in  
37 H<sub>2</sub>S, and identified genes involved in cysteine degradation in all 3 genomes. Finally, to assess  
38 the presence of these organisms and genes in the environment, we surveyed a five-year time  
39 series of metagenomic data from the same isolation source at Lake Mendota and identified their  
40 presence throughout the time series. Overall, our study shows that sulfur-containing amino acids  
41 can drive microbial H<sub>2</sub>S production in oxic environments. Future considerations of sulfur  
42 cycling and biogeochemistry in oxic environments should account for H<sub>2</sub>S production from  
43 degradation of organosulfur compounds.

44

## 45 **Importance**

46 Hydrogen sulfide (H<sub>2</sub>S), a naturally occurring gas with biological origins, can be toxic to living  
47 organisms. In aquatic environments, H<sub>2</sub>S production typically originates from anoxic (lacking  
48 oxygen) environments such as sediments, or the bottom layers of lakes. However, the  
49 degradation of sulfur-containing amino acids such as cysteine, which all cells and life forms rely  
50 on, can be a source of ammonia and H<sub>2</sub>S in the environment. Unlike other approaches for the  
51 biological production of H<sub>2</sub>S such as dissimilatory sulfate reduction, cysteine degradation can

52 occur in the presence of oxygen. Yet, little is known about how cysteine degradation influences  
53 sulfur availability and cycling in freshwater lakes. In our study, we found that multiple bacteria  
54 originating from a freshwater lake can not only produce H<sub>2</sub>S, but do so in oxic conditions.  
55 Overall, our study highlights the ecological importance of oxic H<sub>2</sub>S production in natural  
56 ecosystems, and necessitates a change in our outlook of sulfur biogeochemistry.  
57

## 58 **Introduction**

59  
60 In most natural environments, the production of hydrogen sulfide gas (H<sub>2</sub>S) is usually attributed  
61 to defined groups of bacteria and archaea (1, 2) , and occurs primarily in anoxic environments.  
62 During the process of dissimilatory sulfate reduction, sulfate acts as a terminal electron acceptor,  
63 and is converted to hydrogen sulfide. However, other pathways for H<sub>2</sub>S production exist, namely  
64 assimilatory sulfate production, in which H<sub>2</sub>S contributes to cell growth and increased biomass,  
65 and the conversion of sulfur-containing amino acids such as cysteine which can lead to  
66 production of pyruvate, ammonia, and H<sub>2</sub>S (3). It is believed that assimilatory sulfate reduction  
67 contributes to growth but does not release H<sub>2</sub>S from the cell, while dissimilatory sulfate  
68 reduction and cysteine degradation can contribute to growth and release ecologically relevant  
69 nitrogen and sulfur compounds into the ecosystem.

70  
71 The sulfur cycle is composed of several assimilatory and dissimilatory pathways, which interact  
72 in complex ways through biotic and abiotic factors. Sulfur cycling in freshwater ecosystems can  
73 have significant ecological significance, especially in places where strong redox gradients exist  
74 (4). For example, in high arctic lakes, sulfur-compounds are suggested to serve as  
75 biogeochemical hubs (5). Cysteine, a sulfur containing amino acid, has been proposed to be an  
76 overlooked carbon source (6) and is an overlooked source of sulfur. Additionally, seston  
77 (moving water that contains both living and nonliving organisms) contains organosulfur  
78 containing lipids which settle into the sediments, and contributes to the sulfur pool in lakes such  
79 as Lake Superior (7).

80

81 In seasonally stratified lakes consisting of two layers of oxygenated warm water (epilimnion)  
82 floating atop colder anoxic waters (hypolimnion), H<sub>2</sub>S is often abundant in the hypolimnion (8,  
83 9), due to the presence of anoxic sediment and an anoxic water column. However, an overlooked  
84 player in the pool of available H<sub>2</sub>S is the utilization of organosulfur compounds such as cysteine  
85 by microbes. Cysteine is required for the production of proteins and is important for protein  
86 structure. It is one of the two amino acids (methionine being the other) that contains a sulfur  
87 group; however, the sulfhydryl group on cysteine is more reactive and can lead to the formation  
88 of H<sub>2</sub>S. Like all amino acids, cysteine also contains an amine group that will form ammonia once  
89 the molecule is degraded. As such, the degradation of cysteine by microbes leads to the  
90 production of H<sub>2</sub>S. H<sub>2</sub>S is ecologically relevant because it can be toxic to plants and animals.  
91 During periods of anoxia, H<sub>2</sub>S can accumulate to levels beyond the threshold for living  
92 organisms, and can cause massive fish kills (10). Unlike other sources of H<sub>2</sub>S, cysteine  
93 degradation could occur under oxic conditions, thereby expanding the environmental scope of  
94 this sulfur pool. In addition, cysteine has been found to be able to be degraded under oxic  
95 conditions in the laboratory, but little information exists on the natural prevalence of this process  
96 in lakes. We expect that H<sub>2</sub>S production in oxic environments (during the mixed water column  
97 periods of the year, and throughout the stratified period in the mixed epilimnion) could result  
98 from cysteine utilization by microbes.

99  
100 In this study, we investigated the prevalence of organosulfur degradation in aquatic ecosystems,  
101 using both laboratory and genomic evidence, to inform our understanding of oxic sulfur cycling  
102 in freshwater lakes (Figure 1). First, we grew bacterial isolates enriched from Lake Mendota's  
103 oxic epilimnion to quantify H<sub>2</sub>S and ammonia production, which informs the potential for  
104 organosulfur degradation in an oxygenated aquatic environment. We found 18 isolates producing  
105 H<sub>2</sub>S under oxygenic conditions. We selected three H<sub>2</sub>S-producing isolates for detailed  
106 characterization using full-genome sequencing and chemical analyses to track cysteine and H<sub>2</sub>S  
107 production over their growth: *Stenotrophomonas maltophilia*, *Stenotrophomonas S. bentonitica*  
108 (Gammaproteobacteria) and *Chryseobacterium piscium* (Bacteroidetes). In all three isolates,  
109 cysteine decreased when H<sub>2</sub>S increased over their exponential growth curve under oxic  
110 conditions. Finally, we contextualized our laboratory results using a time-series of metagenomic  
111 data from the same isolation source (Lake Mendota, WI), in order to inform the temporal

112 importance of organosulfur degradation. We found that genes for cysteine utilization were  
113 present and abundant throughout the time-series suggesting that the ability to degrade cysteine is  
114 widely distributed in Lake Mendota.

115

## 116 **Results**

### 117 **Isolates capable of H<sub>2</sub>S production in oxic conditions**

118

119 To answer the question of whether bacteria could produce H<sub>2</sub>S in the presence of oxygen, we  
120 grew pure culture isolates originally isolated from the water column of temperate eutrophic Lake  
121 Mendota. We grew the isolates under control and treatment conditions (addition of cysteine), and  
122 tracked H<sub>2</sub>S production after 24 hours (**Figure 2, Table S1**). Using qualitative H<sub>2</sub>S  
123 measurements, we found that 18 isolates produced H<sub>2</sub>S when grown with cysteine. We  
124 performed 16S rRNA sequencing on the 29 isolates that produced H<sub>2</sub>S. Isolates that produced  
125 both H<sub>2</sub>S and ammonia were identified as *Stenotrophomonas rhizophila*, *Stenotrophomona*  
126 *maltophilia* (Betaproteobacteria), *Citrobacteria gillenii* (Gammaproteobacteria) and  
127 *Chryseobacterium sp.* (Bacteroidetes), whereas those producing H<sub>2</sub>S but not ammonia were  
128 identified as *Pseudomonas arsenicoxydans*, *Pseudomonas mandelii*, *Pseudomonas migulae*,  
129 *Pseudomonas thivervalensis*, and *Microbacterium flavescens*.

130

### 131 **Detailed microbiological, chemical and genomic characterization in selected isolates**

132

133 Next, we selected 3 isolates (#43, #13 and #66) representing distinct species that produced H<sub>2</sub>S  
134 for further characterization. These detailed characterizations include OD<sub>600</sub>-based growth rates,  
135 and paired quantitative measurements of cysteine and H<sub>2</sub>S. The addition of cysteine resulted in  
136 concomittal production of H<sub>2</sub>S over time (**Figure 3A, Table S2**). All organisms used L-cysteine  
137 preferably to D-cysteine (**Figure 3B, Table S3**).

138

139 Next, we also performed full-genome sequencing using combined short-read and long-read  
140 sequencing on these 3 isolates (**Table 1**). We performed full-genome sequencing because  
141 functional information such as gene content cannot be predicted reliably from 16S rRNA  
142 sequencing of the isolates alone. The full genome of Isolate 43 was assembled into a single  
143 circular genome, with estimated completeness of 100%, and taxonomically assigned to  
144 *Stenotrophomonas maltophila*. Unlike the 16S rRNA sequence which assigned it to *S.*  
145 *rhizophila*, the full-genome was actually closer to *S. maltophila*. The full genome of Isolate 13,  
146 could be assembled into 2 long contigs, but also with completeness of 100% and taxonomically  
147 assigned to *S. bentonitica*. The *Chryseobacter* genome was assembled in one circular genome,  
148 and 100% complete, and assigned to *Chryseobacterium piscium*. Overall, the 16S rRNA  
149 amplicon sequencing performed prior agreed with full-genome sequencing assignment in some  
150 cases, and in others, the whole-genome sequencing assignment allowed finer taxonomic  
151 resolution (such as in the case of Isolate 13), and overall provides more information about the  
152 genetic content of the genomes. The genomic content was then used to inform how or why H<sub>2</sub>S  
153 might be produced in oxic environments, as shown in the laboratory experiment.

154

155 Using genome-level gene annotations of the 3 isolates, we identified the presence of genes  
156 involved in cysteine utilization. We identified genes involved in the degradation of cysteine to  
157 ammonia, pyruvate and H<sub>2</sub>S: metC, malY, tnaA, cysM, cysK (these 5 start from L-cysteine), and  
158 dcyD (which uses D-cysteine as a starting substrate) (**Table S4**). However, we note that these  
159 genes may have other enzymatic activities, such as cysteine biosynthesis instead of degradation  
160 (**Table S5**). (**Figure 4**)

161

162 Leveraging the full-genomic content of the 3 isolates (**Table S6**), we proposed a cellular map of  
163 these isolates (**Figure 5A**). All three isolates had genes related to central carbon metabolism:  
164 including the TCA cycle, glycolysis, gluconeogenesis, the pentose phosphate pathway and the  
165 glyoxylate cycle. They could both generate fatty acids using fatty acid biosynthesis, and utilize  
166 fatty acids through the beta-oxidation pathway. As expected, they had genes for the cysteine  
167 metabolism, including cysteine biosynthesis pathways from homocysteine and serine, as well as  
168 other amino acid utilization, such as methionine degradation pathway.

169

170 In spite of these similarities, the three isolates also have distinguishing characteristics amongst  
171 them (**Table S6, Figure 5B**). For example, while all have genes for sulfur oxidation (sulfur  
172 dioxygenase), genes for thiosulfate oxidation were present in the two *Stenotrophomonas* isolates  
173 but not *Chryseobacterium*. Isolate #66 (*Chryseobacter piscium*) contained a urease suggesting  
174 the use of organic nitrogen in the form of urea but this was absent in the two *Stenotrophomonas*  
175 isolates.

176

177 Finally, many more genes for sugar utilization were identified in the two *Stenotrophomonas*  
178 isolates in the comparison to *Chryseobacterium*.

### 179 **Presence of cysteine-degrading organisms and genes in a five-year metagenomic** 180 **environmental time-series**

181

182 To put these laboratory results and lab-grown organisms into a natural environment context, we  
183 leveraged previously published genomic time-series of Lake Mendota spanning 2008-2012 in the  
184 oxygenated epilimnion to search for the presence of cysteine degradation genes in metagenomic  
185 data.

186

187 First, we searched the time-series to see if organisms in our study were also present in the time  
188 series. To do this, we linked the 16S rRNA sequences of the isolated organisms to the assembled  
189 metagenomes from the time series. We found that while the 16S rRNA sequences were also  
190 present in the time series (**Table S7, S8, S9**), and broadly distributed over time, these scaffolds  
191 were not part of binned genomes. Therefore, little information about these isolates would be  
192 gathered from metagenomic data only. As such, the full-genome sequencing we performed was  
193 particularly helpful in understanding the full genomic structure of the H<sub>2</sub>S-producing organisms.

194

195 Second, we searched for the 6 genes associated with cystine degradation and production of H<sub>2</sub>S  
196 (**Table S5**) (in binned and unbinned scaffolds). In total, we searched over 22 million amino acid  
197 sequences and identified 1882 hits to 5 genes, since no dcyD homologs (involved in the D-  
198 cysteine to pyruvate, ammonia and hydrogen sulfide degradation pathway) were found (**Figure**  
199 **6, Table S10**). *cysK* and *malY* were the genes with most corresponding matches at any time

200 point, followed by metC and cysM. Only 2 scaffolds contained tnaA. Overall, after correcting for  
201 the genome size, there was no visible temporal trend of the genes, although genes were found  
202 throughout the 5-year time series.

203  
204 Among these cysteine-degrading gene sequences, several were identified in binned MAGs  
205 (**Figure 6B, Table S11**), therefore taxonomy could be assigned to them. Overall, 139 genes were  
206 distributed in genomes of Actinobacteria, Bacteroidetes, Chloroflexota, Cyanobacteria,  
207 Planctomycetes, Proteobacteria, and Verrucomicrobia, which are common freshwater bacteria,  
208 and broadly distributed in freshwater lakes. tnaA was only present in Bacteroidetes, but other  
209 genes were more broadly distributed.

210  
211

## 212 **Discussion**

213

### 214 **Different types of H<sub>2</sub>S production: the fate of cysteine and the origin of the H<sub>2</sub>S**

215 The H<sub>2</sub>S producing isolates identified by us fell into two groups, ammonia-producing and  
216 ammonia-consuming, when grown in media with cysteine. We hypothesize that those that  
217 produced ammonia and H<sub>2</sub>S in the presence of cysteine, but not under “controlled” conditions  
218 were those that were potentially contributing to the H<sub>2</sub>S pool. However, it is possible that the  
219 isolates that consume ammonia also conduct the cysteine degradation pathway, but do not  
220 excrete ammonia from the cell. Instead, since ammonia is an important biological compound, it  
221 could be used by the organism instead of being released into the media and measured.

222

223 We do not believe that this occurs with H<sub>2</sub>S, and that most, if not all, of the isolates that produce  
224 H<sub>2</sub>S in the presence of oxygen will excrete it from the cell. H<sub>2</sub>S is toxic to organisms that  
225 undergo aerobic cellular respiration (11). There is evidence that some bacteria use H<sub>2</sub>S as a  
226 protective compound against antibiotics, but it also creates a large amount of stress on the cell  
227 making it useful only in extreme situations (12). While it is possible that organisms may use H<sub>2</sub>S



228 internally as a source of sulfur, we did not identify any sulfide quinone oxidoreductases,  
229 flavocytochrome c dehydrogenases, or other genes for the oxidation or transformation of H<sub>2</sub>S.  
230 All 3 isolates were obligate aerobes based on laboratory assays.

231  
232 Of the 20 amino acids, little is known about the cysteine in the environment. One of the  
233 difficulties in studying the fate of cysteine in oxic environments is that it can be oxidized into  
234 cystine (13), which *E.coli* has been shown to uptake (14). In a study of *E.coli* K-12 that lacked a  
235 cysteine transporter, cysteine was found to be able to enter the cell through transporters  
236 dedicated to other amino acids that worked best when no amino acids alternatives other than  
237 cysteine were present in the medium (15). It is likely that the majority of H<sub>2</sub>S produced by the  
238 cell in the three isolates originates from cysteine given the demonstrated reduction in cystine  
239 concentrations when the isolates are grown with added cysteine (**Figure 3**), coupled with the  
240 release of H<sub>2</sub>S and production of ammonia.

#### 241 **Genomic structure of the H<sub>2</sub>S-producing isolates**

242  
243 Overall, the three isolates selected for whole genome sequencing revealed genes for cysteine  
244 degradation into H<sub>2</sub>S. Based on laboratory studies, they were able to produce H<sub>2</sub>S in the presence  
245 of oxygen. All genomes were obligate aerobes, which brings interesting questions about the life  
246 history of these organisms.

247  
248 Little information is known about the ecology of *Stenotrophomonas maltophilia*,  
249 *Stenotrophomonas Bentonitica*, and *Chryseobacterium piscium* in the natural environment. *S.*  
250 *bentonitica* was originally characterized in bentonite formations, and was predicted to have high  
251 tolerance to heavy metals (16), and has been observed in arctic seawater (17). *C. piscium* was  
252 also isolated from a fish in the arctic ocean (18), but its ecological significance in the oceans  
253 remains unknown. This previously described *C. piscium* strain LMG 23089 was not reported to  
254 produce H<sub>2</sub>S yet our genetic analyses suggest that it has the enzymatic machinery to degrade  
255 cysteine.

256

257 One possible explanation for this discrepancy is that LMG 23089 was previously grown on SIM  
258 medium to test H<sub>2</sub>S, which is lower resolution than the modern H<sub>2</sub>S probes which measure μM  
259 concentrations, and because SIM medium uses thiosulfate as a sulfur source. As a side test on  
260 isolate #66, H<sub>2</sub>S was not produced when thiosulfate was provided, but H<sub>2</sub>S was produced when  
261 cysteine was provided.

262

263 One particular finding of this study was that none of the 6 genes searched for cysteine  
264 degradation into H<sub>2</sub>S and ammonia was common to *all* three isolates, despite all three isolates  
265 showing the same cysteine-decrease, ammonia-increase and H<sub>2</sub>S-increase over time. This could  
266 be explained by alternative, perhaps less straightforward pathways for H<sub>2</sub>S production. One  
267 pathway is led by a gene named cystathionine gamma-lyase (“CTH” or “CSE”). In some bacteria  
268 and mammals, this enzyme is involved in H<sub>2</sub>S production (19). A HMM search for this enzyme  
269 showed that it was present in Isolate #13, 43 and #66. While it was not initially included in the  
270 initial methods and study, this could hint to another commonality among oxic H<sub>2</sub>S producing  
271 organisms.

## 272 **Challenges associated with measuring oxic H<sub>2</sub>S production from organosulfur in the** 273 **environment**

274

275 Extrapolating these laboratory results to widespread distribution of organosulfur degradation in  
276 the natural environment necessitates several steps, namely because of the major gaps that exist  
277 concerning the sulfur cycle in freshwater lakes, and because bridging the gap between  
278 cultivation-based, omics-based (20), and field-based experiments is needed. Foremost, the  
279 identity, distribution, and availability of organosulfur compounds broadly across lakes globally is  
280 currently mostly unknown. Cysteine is notoriously difficult to measure, and many previous  
281 studies characterizing the amino acid composition of the water column only measure the sulfur-  
282 containing organosulfur compound taurine (21, 22).

283

284 Organic sulfur in the form of cysteine is an important organosulfur amino acid, and is important  
285 in protein folding and function (23). As such, there is a difference in the fates of cysteine when it  
286 exists bound in cell walls, versus when cysteine is free in the water column and available for

287 degradation by bacteria. While cysteine has been shown to contribute to the carbon pool and  
288 carbon flow in lakes (6), more quantitative field measurements are necessary to support whether  
289 cysteine also serves as a sulfur pool. Yet, other forms of organosulfur have important  
290 significance in aquatic environments. In marine environments for example DMSP  
291 (dimethylsulfoxonium propionate) is a critical component of the marine organosulfur cycle (24).

292

293 Additionally, current differences between computational gene homology searches versus *in vivo*  
294 enzymatic functions are challenging to assess for the genes responsible for the degradation of  
295 cysteine into pyruvate, ammonia and H<sub>2</sub>S. One reason is that the enzymatic activity of the gene  
296 has mostly been described in model organisms such as *E. coli*, and it has been shown that gene  
297 activity can be induced by genetic factors, or environmental factors such as metals (25). At least  
298 6 genes have been proposed to have this enzymatic activity, yet, each gene may serve different  
299 functions *in situ*, and it is difficult to assert directionality of enzymatic function based on  
300 metagenomic or genomic analyses only. To this end, the isolated bacterial strains from this  
301 study, which are non-model organisms, and originate from the natural freshwater lake  
302 environment, may be used for further detailed biochemical, physiological, and microbiological  
303 studies. Further characterization of these bacterial isolates using gene-knockouts and gene  
304 expression studies may inform the functional activity of these genes in nature.

305

### 306 **Implications of oxic H<sub>2</sub>S production by microbes in freshwaters**

307

308 This study demonstrates that the production of H<sub>2</sub>S by microbes in lake ecosystems occurs in the  
309 presence of oxygen, using evidence from pure culture bacterial isolates, and screening of long-  
310 term time series of metagenomic lake data. By combining lake-to-laboratory experiments, we  
311 show that multiple bacterial strains spanning Gammaproteobacteria, Betaproteobacteria,  
312 Actinobacteria and Bacteroidetes are all able to produce H<sub>2</sub>S under oxic conditions, and at  
313 temperatures that would be ecologically relevant for surface lake water during the summer.  
314 Surface water temperatures in Lake Mendota can reach up to 27°C, and the top few meters of  
315 water surface are saturated in oxygen. Long-term ecological data shows such trends. Worldwide,  
316 maximum lake surface temperature can range between 23 to 31°C (26) (**Table S12**).

317

318 Unlike dissimilatory sulfate reduction, cysteine utilization by bacteria to generate ammonia,  
319 pyruvate and H<sub>2</sub>S, is not dependent on sulfate as an initial reaction substrate. Increased sulfate  
320 concentrations are shown to lead to higher sulfide reduction rates in shallow eutrophic  
321 freshwater, the sulfur originating from algal decay for example (27). While Lake Mendota is a  
322 low-iron and high sulfate lake (28), not all lakes have elevated sulfate levels, and therefore, H<sub>2</sub>S  
323 production might previously not have been thought of as relevant to study. However, sulfur-  
324 containing amino-acids can have many origins. In lakes, concentrations of amino acids (free and  
325 combined) often reflect the input and outputs of the lake (29, 30). For example, amino acids  
326 (although cysteine was not measured) contribute a detectable amount to the nitrogen cycle, and  
327 are facilitated by bacterial activity (30).

328

329 There are several implications for aerobic H<sub>2</sub>S production in oxygenated aquatic ecosystems. In  
330 the carbon cycle, once aerobic methanotrophs were identified as early as 1900's, further aerobic  
331 methanotrophs from various phyla of bacteria were found to be ubiquitous in aquatic ecosystems,  
332 and have had implications for the cycling of methane, a potent greenhouse gas that is 25X more  
333 potent than CO<sub>2</sub>. Likewise, the discovery of aerobic bacterial methanogenesis (31), contributes to  
334 resolving the "methane paradox", in which methane was often measured in oxygenic surface  
335 waters, yet the molecular paradigm explaining it previously was strictly known to occur in  
336 anoxic environments. In these two cases, the observation of the processes (methanogenesis and  
337 methane consumption) that were typically thought to occur in anoxic environments only, but in  
338 oxic environments now, are crucial for the understanding of the carbon (biogeochemical cycle).  
339 In a similar vein, much remains to be discovered about the sulfur cycle. In lakes, H<sub>2</sub>S has  
340 typically been associated with anoxic environments, and from processes that are oxygen-  
341 sensitive such as dissimilatory sulfate reduction. Here, we show hydrogen-sulfide production to  
342 not only occur in oxic conditions but also by several guilds of bacteria, and in detectable  
343 quantities.

344

345 Freshwater lakes which are dimictic can become stratified in temperature and oxygen during the  
346 summer, and oxygen concentrations vary throughout the year. In the fall and spring, oxygen is  
347 abundant, and cysteine degradation into H<sub>2</sub>S could be a relevant process for the sulfur pool, and

348 the fluxes of H<sub>2</sub>S to the atmosphere could be significant since wind is prevalent. Under ice  
349 during the winter, where oxygen is plentiful, H<sub>2</sub>S could be produced but could be consumed or  
350 oxidized, but gases would be trapped under ice. During summer, the anoxic hypolimnion and  
351 sediments are known sources of H<sub>2</sub>S due to dissimilatory sulfate reduction, but density gradients  
352 would prevent H<sub>2</sub>S from reaching the atmosphere. However, during the summer, the oxygenated  
353 mixed epilimnion could be sources of H<sub>2</sub>S through organosulfur degradation. If we consider the  
354 importance of oxic hydrogen sulfide production, which could occur year-round, the pool of H<sub>2</sub>S  
355 and the scope of sulfur transformations may be greater than anticipated, if we focus solely on the  
356 anoxic hypolimnion (**Figure 7**). Future work aiming to understand the broader distribution of  
357 sulfur-containing amino acids and other organosulfur compounds in freshwaters, their fates and  
358 transformations, as well as their contribution to H<sub>2</sub>S production, will inform global sulfur  
359 biogeochemical cycling.

360

## 361 **Methods**

362

### 363 **Enrichment cultures of isolates from a temperate freshwater lake**

364 Lake Mendota (43°06'24" N 89°25'29" W) is a temperate eutrophic lake in South-Central  
365 Wisconsin, in Madison, WI, USA. Lake Mendota is part of the Long-Term Ecological Research  
366 Network North Temperate Lakes (NTL-LTER, <https://lter.limnology.wisc.edu/about/lakes>).  
367 Lake Mendota encounters annual stratification and annual seasonal anoxia in the hypolimnion.  
368 Lake water was collected on September 14, 2018 from an integrated water sample (0m to 12m)  
369 from Lake Mendota at the Deep Hole location (43°05'54", 89°24'28"), where the maximum  
370 depth is 23.5m. The lake water was collected in pre-acid washed 2L sampling bottles using a  
371 flexible PVC tubing, and brought back on shore within hours for immediate processing. The  
372 water samples were collected during stratification and the oxygenated epilimnion. Serial dilution  
373 was performed and grown on PCB (plate count media broth) agar media, at room temperature  
374 (~21°C), in the lab. The PCB media was made of: 1L water, 5g/L of yeast extract, 10g/L of

375 tryptone and 2g/L of dextrose/D-glucose. If grown on solid media, 10g of agar per 1L media was  
376 added. Enrichment resulted in about 60 isolates.

377

### 378 **Screening for cysteine degradation into H<sub>2</sub>S and ammonia**

379 Isolates were able to grow on PCB and R2A media. R2A media is a culture medium for bacteria  
380 that typically grow in water. It is less “nutrient rich” than PCB media, and therefore slightly  
381 closer to natural lake water. For the screening of the isolates for H<sub>2</sub>S production, we grew them  
382 on R2A media. Each isolate had two treatments: grown in R2A media without cysteine for the  
383 control, and grown in R2A media with amended cysteine as the treatment.

384

385 R2A media consisted of (1L of water): 0.5g of casein, 0.5g of dextrose, 0.5g of starch, 0.5g of  
386 yeast extract, 0.3g of K<sub>2</sub>HPO<sub>4</sub>, 0.3g of sodium pyruvate, 0.25g of peptone, 0.25g of beef extract,  
387 0.024g of MgSO<sub>4</sub>, and autoclave. To make the same media for plates, we added 15g of agar  
388 before autoclaving. For controls, isolates were grown in the media without cysteine amendments.  
389 For “treatments”, 2mM cysteine was added.

390

391 To assess the amount of cysteine degradation into H<sub>2</sub>S and ammonia, we screened each 60  
392 isolates on whether they produce H<sub>2</sub>S and/or ammonia. To test H<sub>2</sub>S production, we grew the  
393 strains individually in liquid media, and used lead acetate test strips (Fisher Scientific, USA) to  
394 qualitatively assess H<sub>2</sub>S production. A darkening of the strip shows that H<sub>2</sub>S was produced. To  
395 test ammonia concentrations after 24 hours, we measured samples at time zero, and 24 hours  
396 using Ammonia Salicylate Reagent Powder Pillows and Ammonia Cyanurate Reagent Powder  
397 Pillows (Hatch Reagents) and used spectrophotometry at the 655nm wavelength.

398

### 399 **Identification of H<sub>2</sub>S producing bacteria using 16S rRNA sequencing**

400 Colony PCR and DNA extractions were conducted using the EtNa Crude DNA Extraction and  
401 ExoSAP-ITTM PCR Product Cleanup protocols on the isolates that tested positive for producing  
402 H<sub>2</sub>S (10). Full length 16S rRNA products were generated for sequencing using universal 16S  
403 rRNA primers (27f, 1492r). DNA concentration yields were measured using the qBit dsDNA HS

404 assay kit (QuBit). DNA was sequenced at the University of Wisconsin Madison Biotechnology  
405 Center (Madison, WI, USA) The program 4Peaks (32) was used to clean the base pairs by  
406 quality-checking followed by homology search using BLASTn against the NCBI Genbank  
407 database (accessed December 2019) (33) to identify the sequences.

### 408 **Detailed characterization of 3 hydrogen-sulfide producing isolates**

409 We selected 3 isolates that could aerobically produce H<sub>2</sub>S for further detailed characterization.  
410 We selected these isolates because some of the 18 isolates had identical 16S rRNA sequences,  
411 therefore we chose isolates that had distinct 16S rRNA sequences for full-genome sequencing.  
412 Additionally, using 16S rRNA sequencing of the isolate, one only was assigned to  
413 *Stenotrophomonas sp.*, and we believed that full-genome sequencing would enable us to get a  
414 higher taxonomic confirmation and more complete information.

415

416 We performed DNA extraction using the PowerSoil Powerlyzer kit (Qiagen) without protocol  
417 modifications, and sent the genomes for full genome sequencing at Microbial Genome  
418 Sequencing Center (MIGS) (Pittsburg, PA) for combined short read illumina and long read  
419 nanopore sequencing. The data was processed by MIGS to assemble the short-reads (Illumina  
420 Next Seq 2000) and long-reads (Oxford Nanopore Technologies) into full-genomes. Quality  
421 control and adapter trimming was performed with bcl2fastq (Illumina) and porechop  
422 (<https://github.com/rrwick/Porechop>) for Illumina and ONT sequencing respectively. Hybrid  
423 assembly with Illumina and ONT reads was performed with Unicycler (34). Genome annotation  
424 of the 3 isolates was done with Prokka v.1.14.5(35), using the --rfam setting.

425

426 Genome completeness and contamination were estimated using CheckM v.1.1.3 (36)  
427 *lineage\_wf*. Taxonomic classification was conducted using GTDB-tk v.0.3.2 (37) with the  
428 database release r95. The full-genome taxonomic classification agreed with the prior 16S rRNA  
429 sequencing results, but we were further able to identify Isolate 43 as *Stenotrophomonas*  
430 *bentonitica*. We ran METABOLIC-G v.4.0 (38) to identify genes associated with cysteine  
431 degradation and other metabolic pathways.

432

433 Growth measurements of the three isolates were measured using OD600 with a  
434 spectrophotometer, with measurements every 1 hour. The isolates were grown in R2A broth  
435 media, shaken in an incubator at 27°C. Aliquots were collected over the growth range for  
436 cysteine measurements. A H<sub>2</sub>S microsensor (Unisense) was used to measure H<sub>2</sub>S over time.  
437

## 438 **Methods to measure Cysteine**

439  
440 Cysteine concentrations were measured as cystine, as described in (39) (<https://osf.io/9k8a6/>).  
441 One of the reasons for measuring cystine instead of cysteine is that in oxic environments,  
442 cysteine is oxidized rapidly into cystine (13, 14). Additionally, unless LC-MS is used, cysteine  
443 can be difficult to measure directly. Samples were diluted 5:4:1 Sample:DI H<sub>2</sub>O:DMSO and left  
444 at room temperature for at least 24 hours. Chromatographic analysis was performed on an  
445 Agilent 1260 Infinity II with a Agilent Zorbax Eclipse Plus C18 RRHT 4.6x50mm, 1.8µm, with  
446 Guard column. Column temperature was maintained at 40°C using an Agilent 1260 TCC  
447 (G1316A).

448  
449 Gradient elution was performed using Mobile Phase A (MPA) consisting of 10mM Na<sub>2</sub>HPO<sub>4</sub>,  
450 10mM Sodium Tetraborate Decahydrate, in DI H<sub>2</sub>O, adjusted to pH 8.2 with HCl, filtered to  
451 0.45µm. Mobile Phase B (MPB) consisted of 45:45:10 Acetonitrile:Methanol:DI H<sub>2</sub>O. Gradient  
452 used for elution was as follows: 0 minutes 98% MPA, 2% MPB; 0.2 minutes 98% MPA, 2%  
453 MPB; 6.67 minutes 46% MPA, 54% MPB; 6.77 minutes 0% MPA, 100% MPB; 7.3 minutes 0%  
454 MPA, 100% MPB; 7.4 minutes 98% MPA, 2% MPB; 8 minutes 98% MPA, 2% MPB. Flow rate  
455 was 2.0mL/min. Pump used was a Agilent Infinity Series G1311B Quat Pump. Pre-column  
456 derivatization was performed using an Agilent 1260 ALS (G1329B) with an injector program.  
457 Detection was performed using an Agilent 1260 Infinity II MWD (G7165A) at 338nm with  
458 10nm bandwidth. Reference was 390nm with 20nm bandwidth.  
459 Recovery was tested during method development. Recoveries of Cystine ranged from 87.2-  
460 101.5%, with an average of 92.1%.



## 461 **Methods to measure H<sub>2</sub>S using a microsensor**

462 Aliquots of at least 1mL were taken from cultures at desired times after inoculation. H<sub>2</sub>S  
463 concentrations were measured by suspending the H<sub>2</sub>S probe (Unisense) in the aliquot and leaving  
464 it in place until measurement stabilized. Measurements were manually edited to exclude data  
465 gathered while the probe was stabilizing in the sample.

466

## 467 **Generation of Metagenome-assembled genomes**

468 Sequencing of the Lake Mendota time series for 2008-2012 was previously done at the Joint  
469 Genome Institute (40), containing 97 times points (and therefore 97 metagenomic datasets).  
470 Metagenomics data was processed in-house. In summary, each metagenome was quality filtered  
471 using fastp (41), and individually assembled using metaSPAdes. Each metagenome was mapped  
472 to each individual assembly using BMap v38.07 (42) version with 95% sequence identity  
473 cutoff. Differential coverage mapping to all samples was used to bin contigs into metagenome-  
474 assembled genomes (MAGs) using Metabat2 v.2.12.1 (43). Bins were quality assessed with  
475 CheckM v.1.1.2 (36), dereplicated with dRep v.2.4.2 (44), and classified with GTDB-tk v.0.3.2  
476 (45). This resulted in a total of 116 MAGs from Lake Mendota (**Table S13**)  
477 (<https://osf.io/qkt9m/>).

478

## 479 **Searching for the presence of the three cultured isolates presence in the Lake Mendota** 480 **time-series**

481 To determine whether the isolates that were cultured in the laboratory were present in the natural  
482 environment, we performed a homology search using Blastn v.2.6.0+ (33) of the 16S rRNA,  
483 using an e-value threshold of 1e-6. 16S rRNA sequences were queried against a custom database  
484 of the scaffolds in the assembly (-db), with a further search against the binned scaffolds in the  
485 116 MAGs (-db). The comprehensive database containing all scaffolds of the assembly  
486 comprised 16,599,321 scaffolds, whereas the final set of MAGs contained 28,395 scaffolds.

487

## 488 **Searching for cysteine genes and isolates presence in time-series**

489  
490 Genes for cysteine degradation were identified using HMMsearch v3.1b2 (46) . HMMs were  
491 downloaded from KoFam (47), accessed May 2020). The KO numbers for the six cysteine  
492 degradation genes are: metC (K01760), cysK (K01738), cysM (K12339), malY (K14155), tnaA  
493 (K01667), and dcyD (K05396) (**Table S4**). Our HMM files are available in **Supplementary File**  
494 **1** but are the same published by KoFAM, with the modification of manual addition of the TC  
495 threshold. HMM-based homology searches were conducted on the 97 Lake Mendota  
496 metagenomes assemblies as described above.

497

## 498 **Data availability**

499 The 16S rRNA sequences for the 29 H<sub>2</sub>S producing isolates, the full genome sequences  
500 (nucleotides and amino acids) for isolates #13, #43 and #66 are available on OSF:  
501 <https://osf.io/g25eq/> during the peer-review process. The sequences will be deposited in NCBI  
502 prior to publication.

## 503 **Acknowledgements**

504 We are thankful to Anna Schmidt for collecting the original lake water from Lake Mendota in  
505 2018, and to Adam Breister and Elizabeth Zanetakos who enriched the bacterial isolates during  
506 summer 2018. We thank Trina McMahon's Lab and the Long-Term Ecological Research  
507 Network, and the Center for Limnology for their field support and prior work on Lake Mendota.  
508 We are thankful for the University of Wisconsin's Water Science and Engineering Laboratory for  
509 the use of their HPLC instrumentation, and James Lazarcik for training and assistance with the  
510 instruments.

511 This work was supported by the USDA National Institute of Food and Agriculture (NIFA) under  
512 grant: Hatch project 1025641. Patricia Tran and Kristopher Kieft received the support from the  
513 Anna Grant Birge Memorial Award from the Center for Limnology for support for the project in  
514 2019. Patricia Tran is supported by the Natural Science and Engineering Research Council  
515 (NSERC) of Canada Doctoral Fellowship. Samantha Bachand was supported by the National

516 Science Foundation (NSF) Research Experience Undergraduate (REU) Award, and the  
517 University of Wisconsin-Madison' Holstrom Environmental Research Fellowship. Kristopher  
518 Kieft was supported by a Wisconsin Distinguished Graduate Fellowship Award from the  
519 University of Wisconsin-Madison, and a William H. Peterson Fellowship Award from the  
520 Department of Bacteriology, University of Wisconsin-Madison.

521

## 522 **Contributions**

523

524 P.Q.T, S.C.B., J.C.H, K.K and K.A contributed to study design and conceptualization. P.Q.T,  
525 S.C.B, J.C.H and K.K conducted experiments on the isolates. J.C.H performed the chemical  
526 analyses of the isolates. P.Q.T, S.C.B and J.C.H conducted genomic analyses. P.Q.T, S.C.B and  
527 E.A.M conducted metagenomic analyses. P.Q.T, S.C.B and J.C.H analyzed the data and  
528 generated figures. P.Q.T, S.C.B, J.C.H and K.A drafted and edited the manuscript. All authors  
529 provided feedback and suggestions.

530

531

532

## 533 **References**

- 534 1. Foti M, Sorokin DY, Lomans B, Mussman M, Zacharova EE, Pimenov NV, Kuenen JG,  
535 Muyzer G. 2007. Diversity, Activity, and Abundance of Sulfate-Reducing Bacteria in Saline  
536 and Hypersaline Soda Lakes. *Appl Environ Microbiol* 73:2093–2100.
- 537 2. INGVOSEN K, BROCK T. 1982. ELECTRON FLOW VIA SULFATE REDUCTION  
538 AND METHANOGENESIS IN THE ANAEROBIC HYPOLIMNION OF LAKE  
539 MENDOTA. *LIMNOLOGY AND OCEANOGRAPHY* 27:559–564.
- 540 3. Tchong S-I, Xu H, White RH. 2005. L-cysteine desulfidase: an [4Fe-4S] enzyme isolated  
541 from *Methanocaldococcus jannaschii* that catalyzes the breakdown of L-cysteine into  
542 pyruvate, ammonia, and sulfide. *Biochemistry* 44:1659–1670.
- 543 4. Berg JS, Jézéquel D, Duverger A, Lamy D, Laberty-Robert C, Miot J. 2019. Microbial  
544 diversity involved in iron and cryptic sulfur cycling in the ferruginous, low-sulfate waters of  
545 Lake Pavin. *PLOS ONE* 14:e0212787.
- 546 5. Vigneron A, Cruaud P, Culley AI, Couture R-M, Lovejoy C, Vincent WF. 2021. Genomic  
547 evidence for sulfur intermediates as new biogeochemical hubs in a model aquatic microbial  
548 ecosystem. *Microbiome* 9:46.
- 549 6. Göbbels L, Poehlein A, Dumnitch A, Egelkamp R, Kröger C, Haerdter J, Hackl T, Feld A,  
550 Weller H, Daniel R, Streit WR, Schoelmerich MC. 2021. Cysteine: an overlooked energy  
551 and carbon source. *Sci Rep* 11:2139.
- 552 7. Petersen M, Schreiner KM, Hyde E, Sheik C, Katsev S. 2019. Characterization of Organic  
553 Sulfur in Lake Superior, and its Contribution to Sulfur Biogeochemical Cycling 2019:B11L-  
554 2247.
- 555 8. Eckert W, Conrad R. 2007. Sulfide and Methane Evolution in the Hypolimnion of a  
556 Subtropical Lake: A Three-Year Study. *Biogeochemistry* 82:67–76.
- 557 9. Peterson BD, McDaniel EA, Schmidt AG, Lepak RF, Janssen SE, Tran PQ, Marick RA,  
558 Ogorek JM, DeWild JF, Krabbenhoft DP, McMahon KD. 2020. Mercury Methylation  
559 Genes Identified across Diverse Anaerobic Microbial Guilds in a Eutrophic Sulfate-  
560 Enriched Lake. *Environ Sci Technol* 54:15840–15851.
- 561 10. Reese BK, Anderson MA, Amrhein C. 2008. Hydrogen sulfide production and volatilization  
562 in a polymictic eutrophic saline lake, Salton Sea, California. *Sci Total Environ* 406:205–  
563 218.
- 564 11. Kabil O, Banerjee R. 2010. Redox Biochemistry of Hydrogen Sulfide. *J Biol Chem*  
565 285:21903–21907.
- 566 12. Pal VK, Bandyopadhyay P, Singh A. 2018. Hydrogen Sulfide in Physiology and  
567 Pathogenesis of Bacteria and Viruses. *IUBMB Life* 70:393–410.
- 568 13. Bagiyan GA, Koroleva IK, Soroka NV, Ufimtsev AV. 2003. Oxidation of thiol compounds  
569 by molecular oxygen in aqueous solutions. *Russian Chemical Bulletin* 52:1135–1141.

- 570 14. Korshunov S, Imlay KRC, Imlay JA. 2020. Cystine import is a valuable but risky process  
571 whose hazards *Escherichia coli* minimizes by inducing a cysteine exporter. *Molecular*  
572 *Microbiology* 113:22–39.
- 573 15. Zhou Y, Imlay JA. *Escherichia coli* K-12 Lacks a High-Affinity Assimilatory Cysteine  
574 Importer. *mBio* 11:e01073-20.
- 575 16. Chen M-X, Li H-Y, Ye X-S, He X-Y. Draft Genome Sequence of an Extracellular Protease-  
576 Producing Bacterium, *Stenotrophomonas bentonitica* VV6, Isolated from Arctic Seawater.  
577 *Genome Announcements* 6:e01610-17.
- 578 17. Sánchez-Castro I, Bakkali M, Merroun ML. Draft Genome Sequence of *Stenotrophomonas*  
579 *bentonitica* BII-R7T, a Selenite-Reducing Bacterium Isolated from Spanish Bentonites.  
580 *Genome Announcements* 5:e00719-17.
- 581 18. de Beer H, Hugo CJ, Jooste PJ, Vancanneyt M, Coenye T, Vandamme P 2006.  
582 *Chryseobacterium piscium* sp. nov., isolated from fish of the South Atlantic Ocean off South  
583 Africa. *International Journal of Systematic and Evolutionary Microbiology* 56:1317–1322.
- 584 19. Sun Q, Collins R, Huang S, Holmberg-Schiavone L, Anand GS, Tan C-H, van-den-Berg S,  
585 Deng L-W, Moore PK, Karlberg T, Sivaraman J. 2009. Structural Basis for the Inhibition  
586 Mechanism of Human Cystathionine  $\gamma$ -Lyase, an Enzyme Responsible for the Production of  
587 H<sub>2</sub>S \*. *Journal of Biological Chemistry* 284:3076–3085.
- 588 20. Hatzenpichler R, Krukenberg V, Spietz RL, Jay ZJ. 2020. Next-generation physiology  
589 approaches to study microbiome function at single cell level. *Nat Rev Microbiol* 18:241–  
590 256.
- 591 21. Hubberten U, Lara RJ, Kattner G. 1994. Amino acid composition of seawater and dissolved  
592 humic substances in the Greenland Sea. *Marine Chemistry* 45:121–128.
- 593 22. Cindy, Lee. 2005. Amino Acid and Amine Biogeochemistry in Marine Particulate Material  
594 and Sediments.
- 595 23. Brosnan JT, Brosnan ME. 2006. The Sulfur-Containing Amino Acids: An Overview. *The*  
596 *Journal of Nutrition* 136:1636S-1640S.
- 597 24. Thume K, Gebser B, Chen L, Meyer N, Kieber DJ, Pohnert G. 2018. The metabolite  
598 dimethylsulfoxonium propionate extends the marine organosulfur cycle. *Nature* 563:412–  
599 415.
- 600 25. Yamamoto K, Oshima T, Nonaka G, Ito H, Ishihama A. 2011. Induction of the *Escherichia*  
601 *coli* *cysK* gene by genetic and environmental factors. *FEMS Microbiol Lett* 323:88–95.
- 602 26. Sharma S, Gray DK, Read JS, O'Reilly CM, Schneider P, Qudrat A, Gries C, Stefanoff S,  
603 Hampton SE, Hook S, Lenters JD, Livingstone DM, McIntyre PB, Adrian R, Allan MG,  
604 Anneville O, Arvola L, Austin J, Bailey J, Baron JS, Brookes J, Chen Y, Daly R, Dokulil M,  
605 Dong B, Ewing K, de Eyto E, Hamilton D, Havens K, Haydon S, Hetzenauer H, Heneberry  
606 J, Hetherington AL, Higgins SN, Hixson E, Izmet'eva LR, Jones BM, Kangur K, Kasprzak  
607 P, Köster O, Kraemer BM, Kumagai M, Kuusisto E, Leshkevich G, May L, MacIntyre S,  
608 Müller-Navarra D, Naumenko M, Noges P, Noges T, Niederhauser P, North RP, Paterson  
609 AM, Plisnier P-D, Rigosi A, Rimmer A, Rogora M, Rudstam L, Rusak JA, Salmaso N,

- 610 Samal NR, Schindler DE, Schladow G, Schmidt SR, Schultz T, Silow EA, Straile D,  
611 Teubner K, Verburg P, Voutilainen A, Watkinson A, Weyhenmeyer GA, Williamson CE,  
612 Woo KH. 2015. A global database of lake surface temperatures collected by in situ and  
613 satellite methods from 1985–2009. *Sci Data* 2:150008.
- 614 27. Chen M, Li X-H, He Y-H, Song N, Cai H-Y, Wang C, Li Y-T, Chu H-Y, Krumholz LR,  
615 Jiang H-L. 2016. Increasing sulfate concentrations result in higher sulfide production and  
616 phosphorous mobilization in a shallow eutrophic freshwater lake. *Water Res* 96:94–104.
- 617 28. Brock TD, Brock TD, Brock WA. 1985. *A Eutrophic Lake: Lake Mendota, Wisconsin*.  
618 Springer-Verlag.
- 619 29. Jørgensen NOG. 1987. Free amino acids in lakes: Concentrations and assimilation rates in  
620 relation to phytoplankton and bacterial production I. *Limnology and Oceanography* 32:97–  
621 111.
- 622 30. Gardner W, Lee G. 1975. The role of amino acids in the nitrogen cycle of Lake Mendota.  
623 *Limnology and Oceanography - LIMNOL OCEANOGR* 20:379–388.
- 624 31. Wang Q, Alowaifeer A, Kerner P, Balasubramanian N, Patterson A, Christian W, Tarver A,  
625 Dore J, Hatzenpichler R, Bothner B, Mcdermott T. 2021. Aerobic bacterial methane  
626 synthesis. *Proceedings of the National Academy of Sciences* 118:e2019229118.
- 627 32. Nucleobytes. 4Peaks: For peaks, four peaks. The DNA sequence trace viewer for OS X.
- 628 33. Camacho C, Coulouris G, Avagyan V, Ma N, Papadopoulos J, Bealer K, Madden TL. 2009.  
629 BLAST+: architecture and applications. *BMC Bioinformatics* 10:421.
- 630 34. Wick RR, Judd LM, Gorrie CL, Holt KE. 2017. Unicycler: Resolving bacterial genome  
631 assemblies from short and long sequencing reads. *PLOS Computational Biology*  
632 13:e1005595.
- 633 35. Seemann T. 2014. Prokka: rapid prokaryotic genome annotation. *Bioinformatics* 30:2068–  
634 2069.
- 635 36. Parks DH, Imelfort M, Skennerton CT, Hugenholtz P, Tyson GW. 2015. CheckM: assessing  
636 the quality of microbial genomes recovered from isolates, single cells, and metagenomes.  
637 *Genome research* 25:1043–55.
- 638 37. Parks DH, Chuvochina M, Waite DW, Rinke C, Skarszewski A, Chaumeil P-A, Hugenholtz  
639 P. 2018. A standardized bacterial taxonomy based on genome phylogeny substantially  
640 revises the tree of life. *Nature Biotechnology* 36:996–1004.
- 641 38. Zhou Z, Tran P, Liu Y, Kieft K, Anantharaman K. 2019. METABOLIC: A scalable high-  
642 throughput metabolic and biogeochemical functional trait profiler based on microbial  
643 genomes. *bioRxiv* 761643.
- 644 39. Hotvedt, Jacob C, Anantharaman, Karthik. 2021. Rapid and cheap quantification of  
645 Cysteine via oxidation to Cystine by DMSO and Ortho-phthalaldehyde pre-column  
646 derivatization.
- 647 40. Bendall ML, Stevens SL, Chan L-K, Malfatti S, Schwientek P, Tremblay J, Schackwitz W,  
648 Martin J, Pati A, Bushnell B, Froula J, Kang D, Tringe SG, Bertilsson S, Moran MA, Shade

- 649 A, Newton RJ, McMahon KD, Malmstrom RR. 2016. Genome-wide selective sweeps and  
650 gene-specific sweeps in natural bacterial populations. *The ISME Journal* 10:1589–1601.
- 651 41. Chen S, Zhou Y, Chen Y, Gu J. 2018. fastp: an ultra-fast all-in-one FASTQ preprocessor.  
652 *Bioinformatics* 34:i884–i890.
- 653 42. Bushnell B. 2014. BBMap: A Fast, Accurate, Splice-Aware Aligner. LBNL-7065E.  
654 Lawrence Berkeley National Lab. (LBNL), Berkeley, CA (United States).
- 655 43. Kang DD, Li F, Kirton E, Thomas A, Egan R, An H, Wang Z. 2019. MetaBAT 2: an  
656 adaptive binning algorithm for robust and efficient genome reconstruction from  
657 metagenome assemblies. *PeerJ* 7:e7359.
- 658 44. Olm MR, Brown CT, Brooks B, Banfield JF. 2017. dRep: a tool for fast and accurate  
659 genomic comparisons that enables improved genome recovery from metagenomes through  
660 de-replication. *The ISME Journal* 1–5.
- 661 45. Chaumeil P-A, Mussig AJ, Hugenholtz P, Parks DH. 2020. GTDB-Tk: a toolkit to classify  
662 genomes with the Genome Taxonomy Database. *Bioinformatics* 36:1925–1927.
- 663 46. Eddy SR. 2011. Accelerated profile HMM searches. *PLoS Computational Biology* 7.
- 664 47. Aramaki T, Blanc-Mathieu R, Endo H, Ohkubo K, Kanehisa M, Goto S, Ogata H. 2019.  
665 KofamKOALA: KEGG ortholog assignment based on profile HMM and adaptive score  
666 threshold. *bioRxiv* <https://doi.org/10.1101/602110>.

667

668

## 669 **List of Main and Supplementary Figures & Tables**

### 670 **List of figures**

671 **Figure 1.** Overview of methods of our study.

672 **Figure 2.** H<sub>2</sub>S and ammonia production screening of the isolates

673 **Figure 3.** H<sub>2</sub>S utilization, L-cysteine and D-cysteine utilization by the 3 isolates over time.

674 **Figure 4.** Diagram showing presence and absence of cysteine degradation genes in the 3 isolates.

675 **Figure 5.** Cellular diagram of genes and pathways common to all three isolates.

676 **Figure 6.** Cysteine utilization/degradation genes in the Lake Mendota Time Series (LMTS)

677 assemblies, and in the MAGs from that assembly.

678 **Figure 7.** Conceptual model of the potential importance of the cysteine degradation in a

679 freshwater lake water column, with respect to oxygen levels and seasonality.

680

### 681 **List of Tables**

682 **Table 1.** Description of the 3 isolates (genome size, taxonomy, etc.)

683

### 684 **List of Supplementary Tables**

685 **Table S1.** Description of all initial isolates used in screening

686 **Table S2.** Quantitative measurement of H<sub>2</sub>S over time in the 3 isolates

687 **Table S3.** Quantitative measurement of cystine over time in the 3 isolates.

688 **Table S4.** Description of the 6 genes involved in the degradation of L-cysteine or D-cysteine into

689 pyruvate, ammonia and hydrogen sulfide

690 **Table S5.** Detailed list of all potential enzymatic activities of genes in the cysteine degradation

691 and biosynthesis pathways.

692 **Table S6.** METABOLIC table: Full genomic content of the 3 isolates

693 **Table S7.** HMMsearch table output of 16S rRNA amplicons of the 28 isolates that produce H<sub>2</sub>S

694 from Figure 1 against the Lake Mendota Time Series assembly.

695 **Table S8.** HMMsearch table output of 16S rRNA amplicons of the 28 isolates that produce H<sub>2</sub>S

696 from Figure 1 against the metagenome-assembled-genomes from the LMTS.

697 **Table S9.** HMMsearch table output of 16S rRNA amplicons of the 28 isolates that produce H<sub>2</sub>S

698 from Figure 1 against the SSU (16S small ribosomal subunit) of the metagenome-assembled-

699 genomes from the LMTS.



700 **Table S10.** Cysteine hits the Assembly.

701 **Table S11.** Cysteine hits to MAGS

702 **Table S12.** MAG characteristics binned from LMTS.

703 **Table S13.** Global minimum and maximum lake surface temperatures (ref. Sharma et al., 2015)

704

705 **List of Supplementary Files**

706 **File S1.** HMM profiles.zip

707

708 **Tables**

709 **Table 1.** Genome characteristics of 3 selected isolates that produce H<sub>2</sub>S in the presence of  
 710 oxygen and cysteine

711

| Name                 | Genome Size (bp) | Completeness <sup>1</sup> | GC content | Taxonomy <sup>2</sup>                                                                                                                                     | NCBI Project ID | Number of contigs |
|----------------------|------------------|---------------------------|------------|-----------------------------------------------------------------------------------------------------------------------------------------------------------|-----------------|-------------------|
| Isolate13-LM-B-02-08 | 4,188,104        | 100%                      | 66.8%      | d__Bacteria;p__Proteobacteria;c__Gammaproteobacteria;o__Xanthomonadales;f__Xanthomonadaceae;g__Stenotrophomonas;s__ <b>Stenotrophomonas maltophilia_O</b> | TBD             | 1                 |
| Isolate43-LM-B-01-03 | 4,325,715        | 100%                      | 66.5%      | d__Bacteria;p__Proteobacteria;c__Gammaproteobacteria;o__Xanthomonadales;f__Xanthomonadaceae;g__Stenotrophomonas;s__ <b>Stenotrophomonas bentonitica</b>   | TBD             | 2                 |
| LM_BA_5.2            | 1,375,102        | 100%                      | 33.7%      | d__Bacteria;p__Bacteroidota;c__Bacteroidia;o__Flavobacteriales;f__Weeksellaceae;g__Chryseobacterium;s__ <b>Chryseobacterium piscium</b>                   | TBD             | 7                 |

712

713 <sup>1</sup> Using CheckM (See Methods)    <sup>2</sup> Using GTDB-tk (See Methods)

## 714 Figures

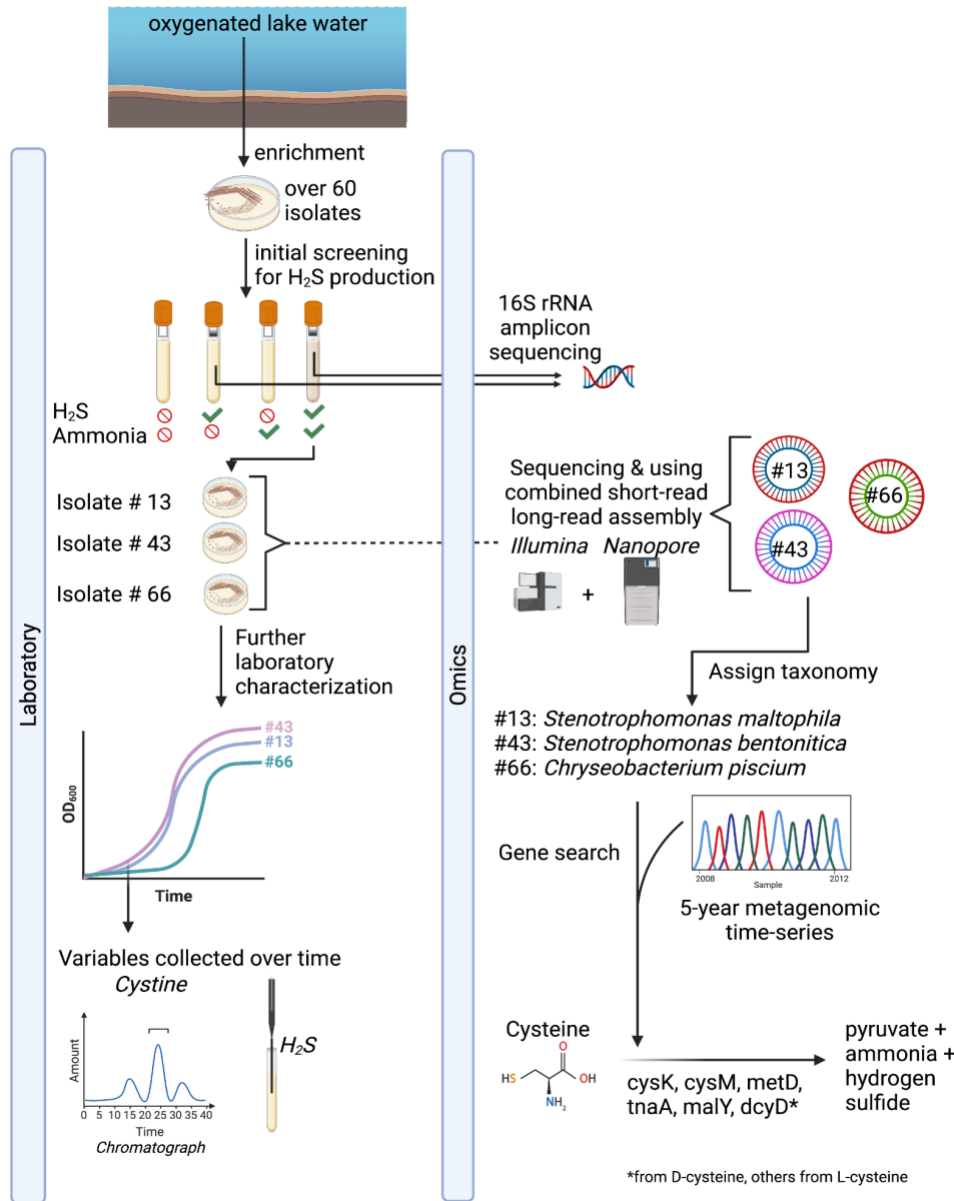

715  
716

717 **Figure 1. Methods overview of our study.** Isolates were enriched from oxygenated lake water.  
718 Isolates were screened for H<sub>2</sub>S and ammonia production, and those that produced H<sub>2</sub>S were  
719 selected for 16S rRNA sequencing. Then based on the results, three isolates were selected for  
720 whole-genome sequencing using a combination of short and long-reads. Genome  
721 characterization of functional potential and taxonomic classification was conducted on the  
722 isolates. Genes involved in cysteine degradation were searched in the isolates, and a five-year  
723 metagenomic time series of Lake Mendota (2008-2012).

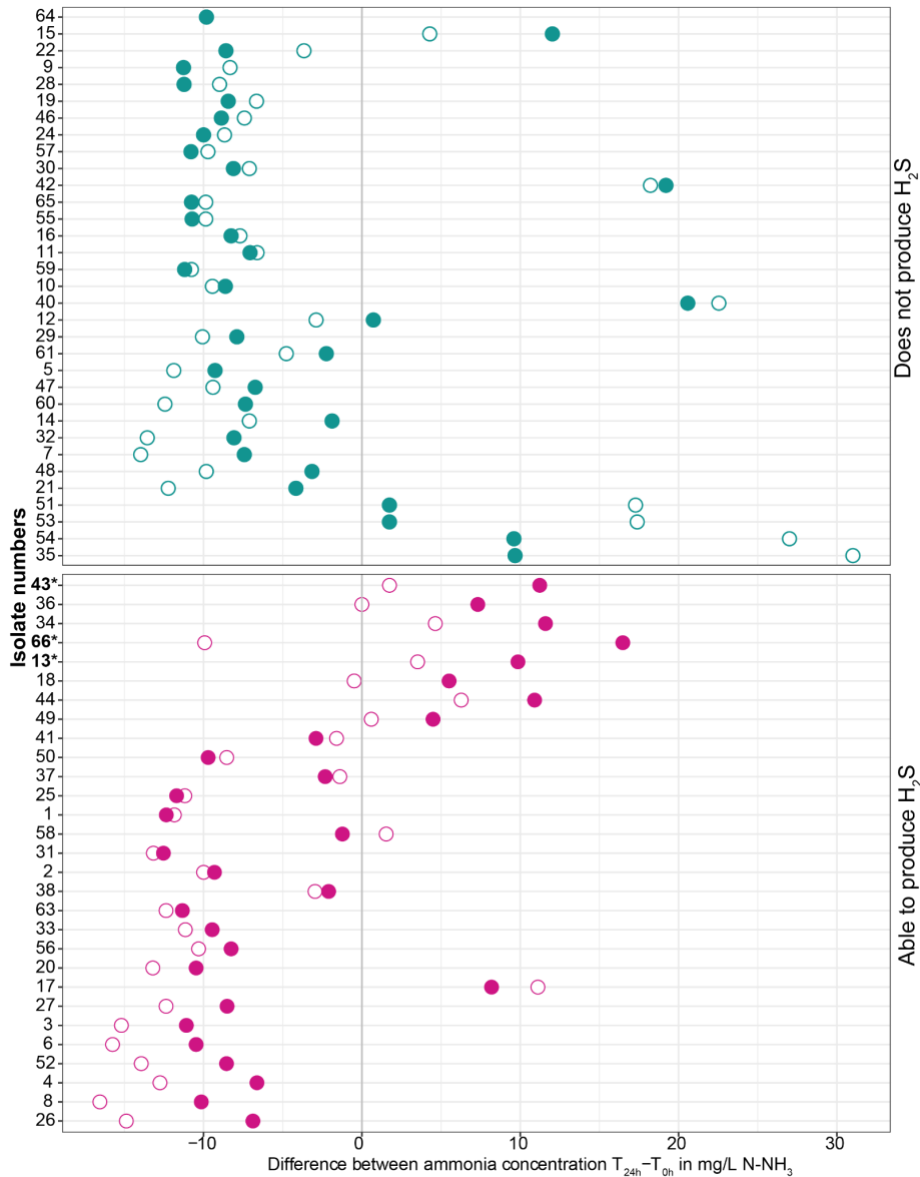

724

725 **Figure 2. Qualitative production of hydrogen sulfide among microbial isolates enriched**

726 **from a freshwater lake water column.** Filled circles are isolates when grown with cysteine, and

727 open circles are isolates when grown without cysteine. The vertical line represents values

728 corrected for the control (natural ammonia production/consumption in the negative control). All

729 points to the right of the vertical lines indicate a production of ammonia, and all points to the left

730 of the vertical lines refer to those that consumed ammonia after 24 hours. The isolates #43, #13

731 and #66 were selected for further analysis.

732

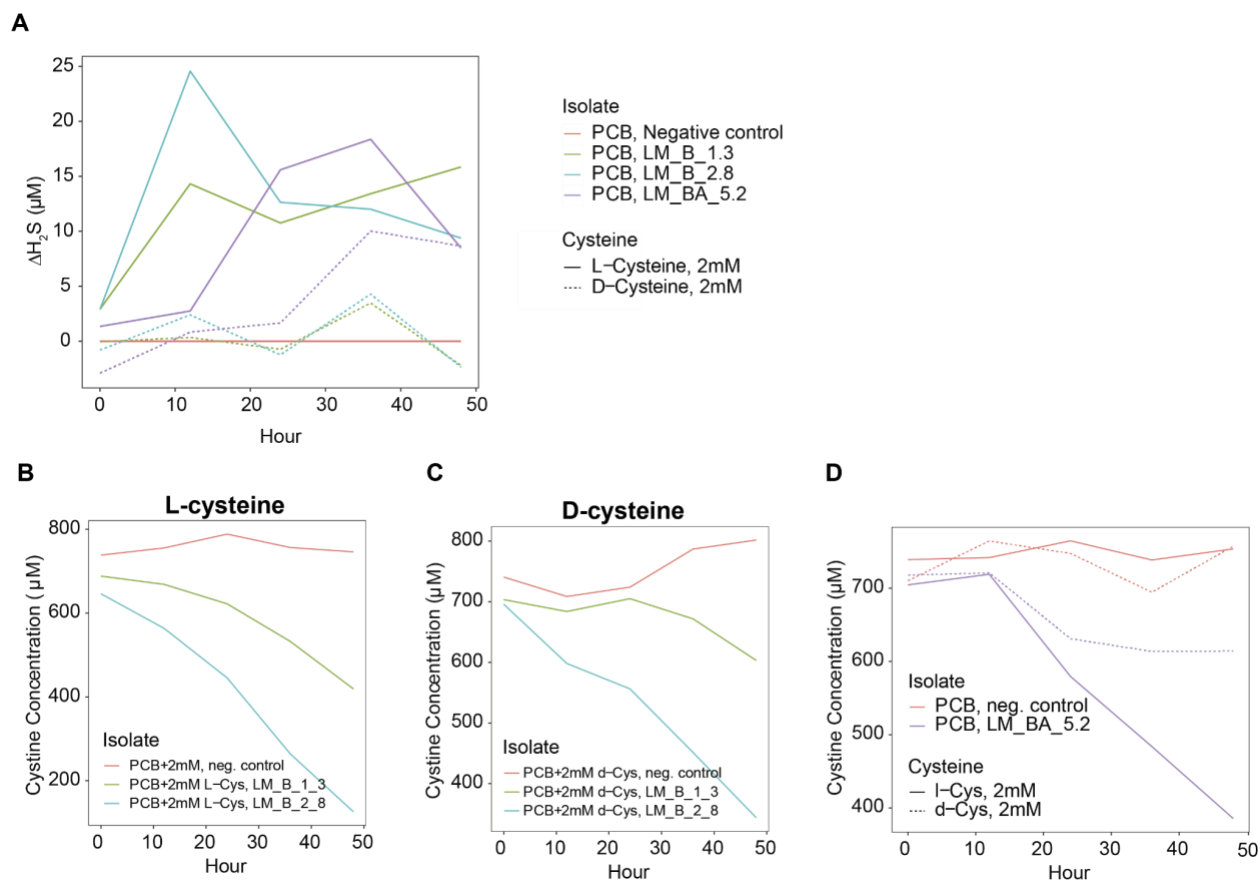

733

734 **Figure 3. Further characterization of the three isolates and demonstration of cysteine**  
735 **degradation and H<sub>2</sub>S production.** A. Higher amounts of H<sub>2</sub>S was produced by the three isolates  
736 over 50 hours compared to negative controls. B, C, D. Identification of different forms of  
737 cysteine that can be degraded. L-cysteine decreased in all isolates compared to the control (B,  
738 D). D-cysteine also decreased over time in all except the negative control, however, the net  
739 amount decreased was less compared to L-cysteine. Cysteine concentrations were measured as  
740 Cystine as described in the methods. Because Isolate #13 and #43 were assessed in another  
741 experiment than #66, but using the exact same instruments and methods, plots are separated by  
742 HPLC runs. Due to large sample volume it was not possible to test all isolates and conditions in  
743 one HPLC run.

744

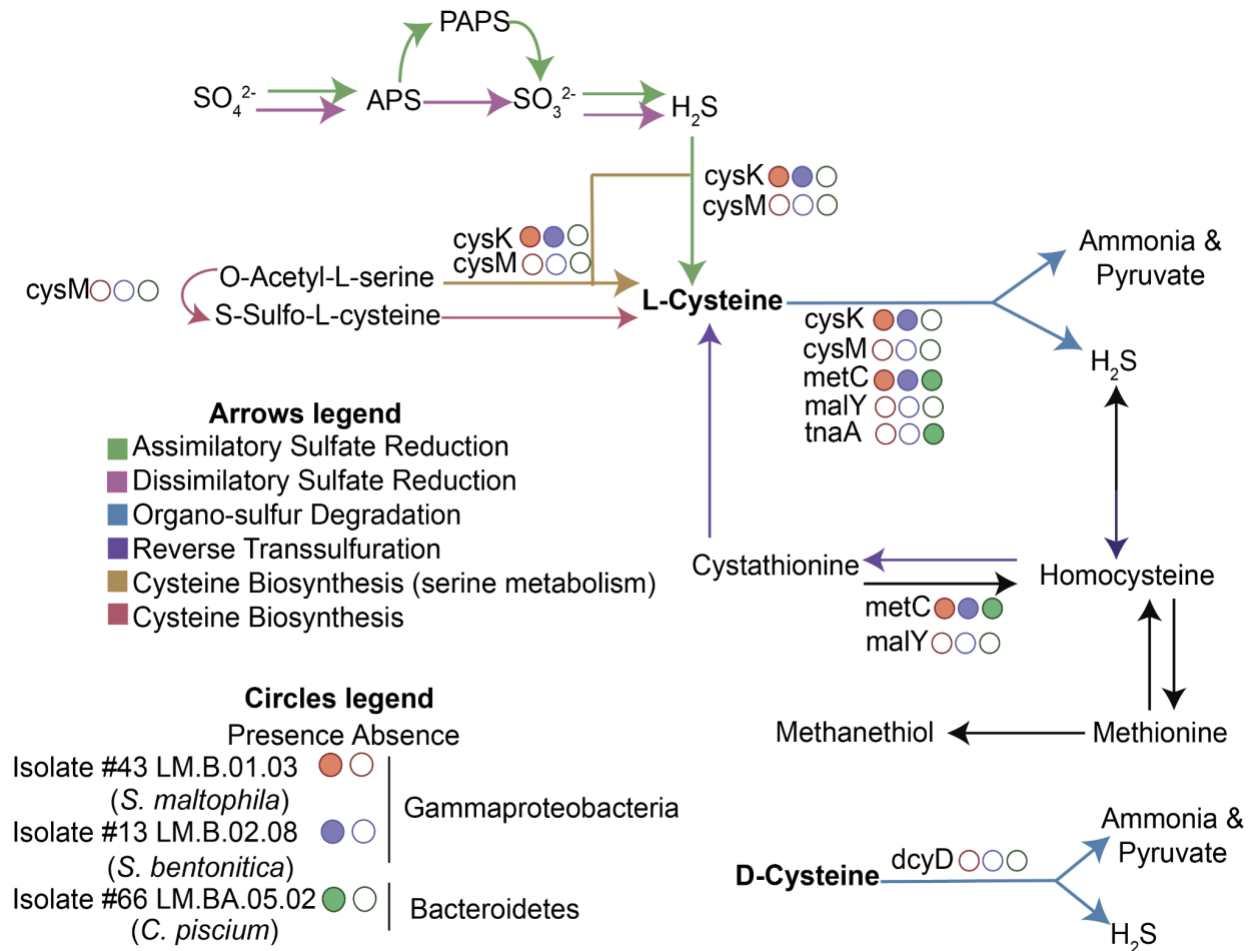

745

746 **Figure 4. Diagram showing pathways for sulfur and organosulfur metabolism.** Several  
 747 pathways for hydrogen sulfide and cysteine production exist in microorganisms. The  
 748 presence/absence of key genes (cysK, cysM, malY, cysM, metC, tnaA, sseA, aspB, and dcyD  
 749 along the blue arrow) in the three isolate's genomes are shown by filled (present) circles, and  
 750 clear (not present) circles.

751

752

753

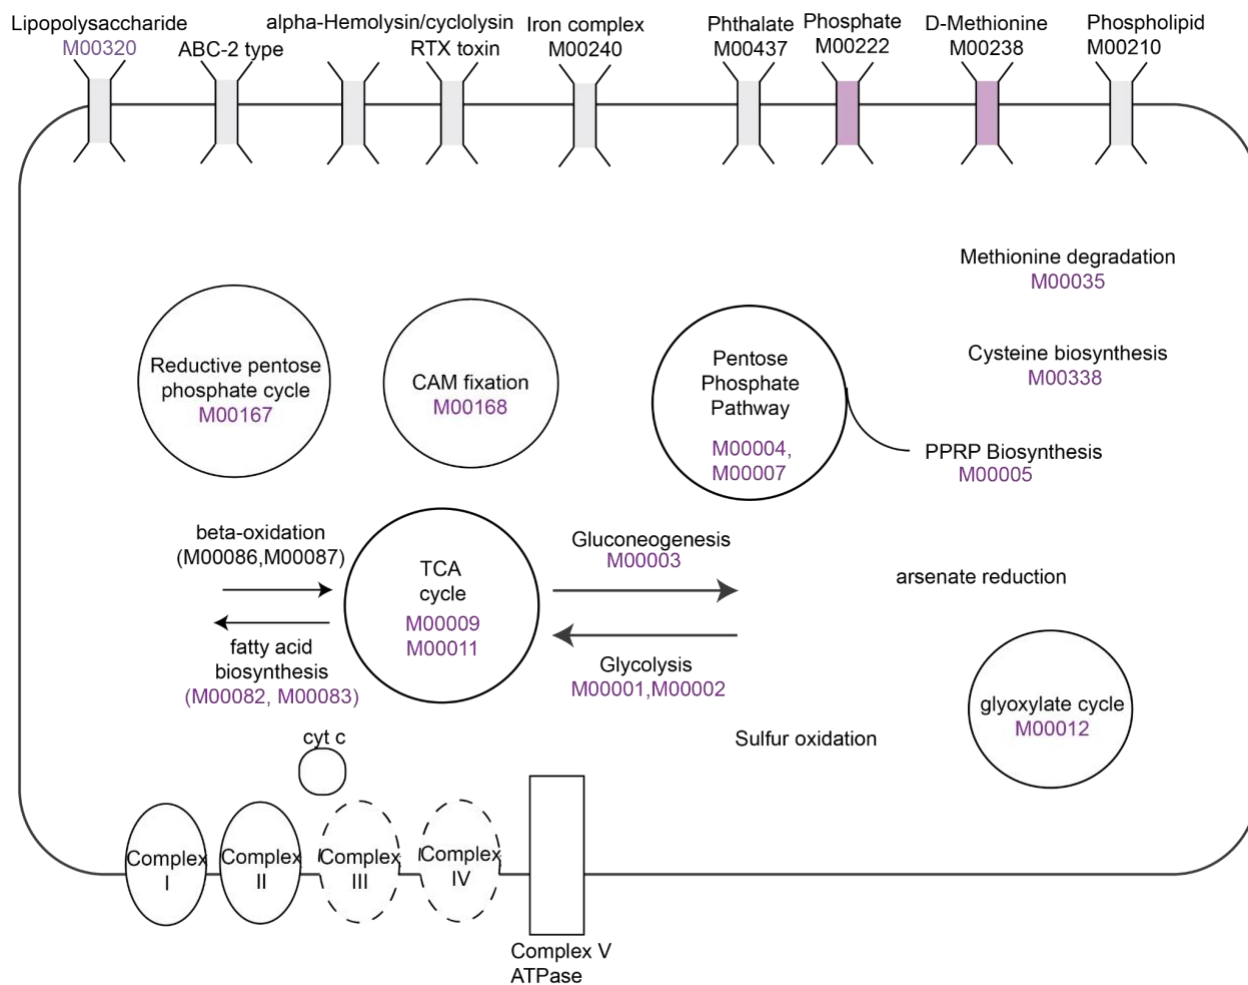

754

755 **Figure 5A. Cellular map showing the pathways, genes, cycles and transporters which were**  
 756 **common to all three isolates. A complete list is found in Table S6. The KEGG module**  
 757 **identifiers are listed in purple whenever relevant.**

758





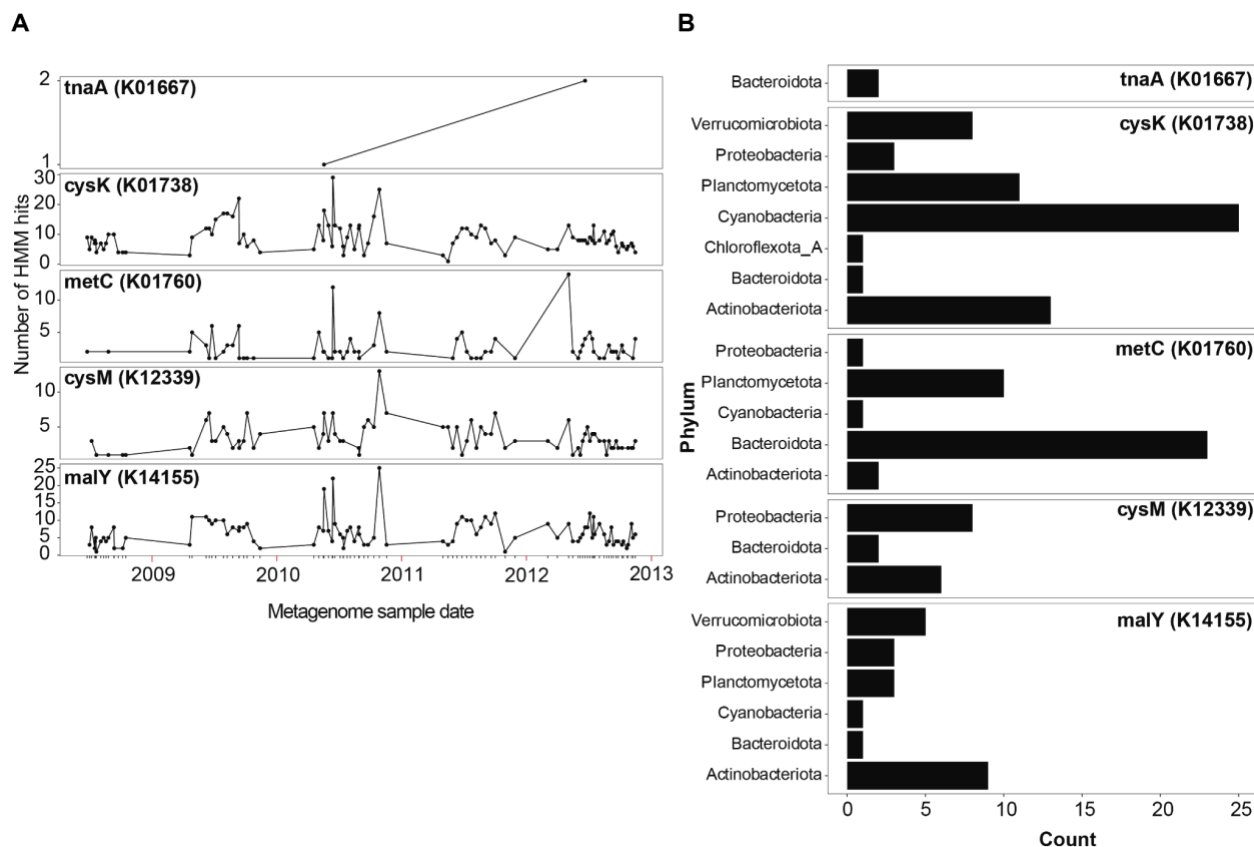

764

765 **Figure 6. A. Number of amino acid coding sequences matching one of the cysteine genes**  
 766 **searched (5 genes) which may have the enzymatic activity of degrading cysteine into**  
 767 **ammonia, pyruvate and hydrogen sulfide. We also searched for dcyD (6th gene) but did not**  
 768 **identify it in any sample. B. Presence of these 5 genes in the binned metagenome-assembled**  
 769 **metagenomes of the same time series.**

770

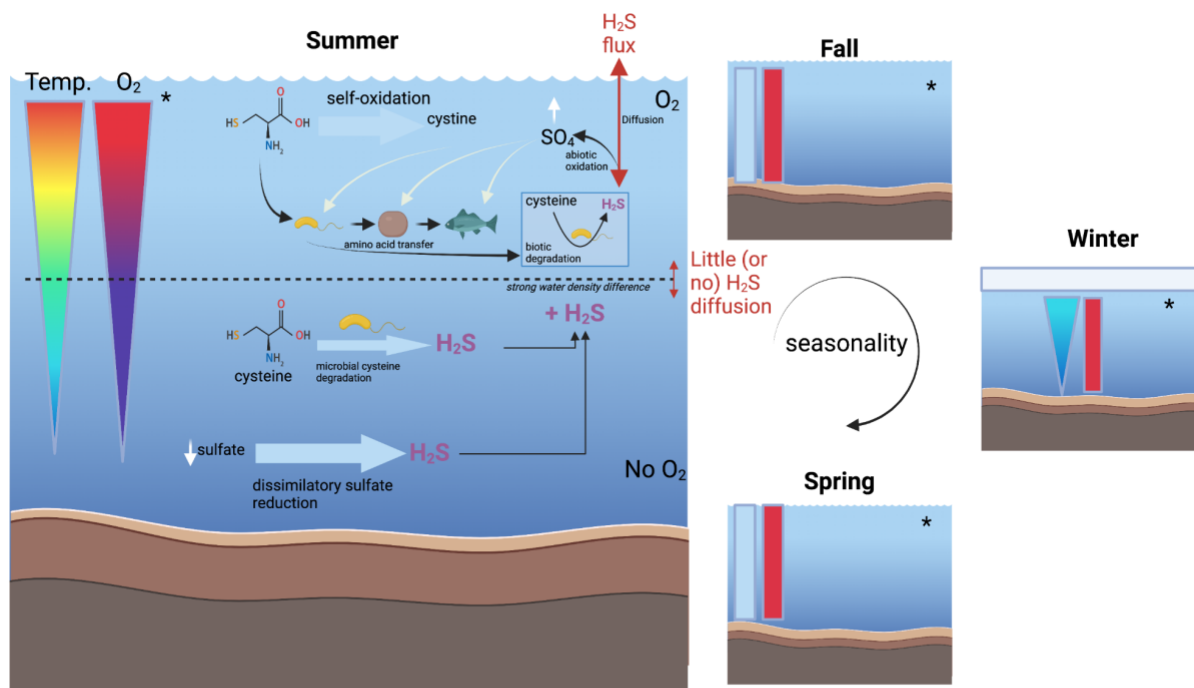

771

772 **Figure 7. Conceptual figure showing the potential relevance of cysteine degradation in a**  
773 **freshwater lake environment, with respect to oxygen availability and seasonality.**

774 Oxygenated seasons and part of the lake water columns are shown with an asterisk. Significant  
775 research gaps include cysteine concentrations in the natural environment over time, H<sub>2</sub>S fluxes  
776 across different layers in the lake water column, and contribution of different H<sub>2</sub>S sources in the  
777 hypolimnion.
